# Supplementary material for: A Salinity Module for SWAT to Simulate Salt Ion Fate and Transportat the Watershed Scale
Source: Copernicus journal article supplement (doi:10.5194/hess-2018-614), 2019-01-22
Supplement: Supplementary file 1 [file hess-2018-614-supplement.pdf]

# A Salinity Module for SWAT to Simulate Salt Ion Fate and Transport at the Watershed Scale

Ryan T. Bailey<sup>1\*</sup>, Saman Tavakoli-Kivi<sup>1</sup>, Xiaolu Wei<sup>1</sup>

<sup>1</sup> Department of Civil and Environmental Engineering, Colorado State University, 1372 Campus Delivery, Fort Collins, CO, 80523-1372, United States.

\*Correspondence to: Ryan Bailey (rtbailey@colostate.edu)

## Supplementary Material

### Code Availability

The code consists of the original SWAT files, with 6 additional files for the salinity module. All files are \*.f FORTRAN files. The code is available at the following URL:

[https://github.com/rtbailey8/SWAT\\_Salinity/tree/v1.0.0](https://github.com/rtbailey8/SWAT_Salinity/tree/v1.0.0) (DOI: 10.5281/zenodo.2541224). An example model input file (salt\_input) and example output files are also provided.
